# Supplementary material for: Habitat-specific trends in taxonomic, functional, and phylogenetic diversity in European plant communities during the last 100 years
Source: Research Square preprint supplement (doi:10.21203/rs.3.rs-7002324/v1), 2025-08-18

**Supplementary Data Table 1. Hand-corrected occurrences of potential name mismatches**, i.e., taxa with different names in subsequent vegetation surveys that belong to the same taxon.

| **Resurvey project** | **Resurvey site** | **“Doppelgaenger taxon”** | **Changed to** | **# of changed occurrences** |
| --- | --- | --- | --- | --- |
|  |  |  |  |  |
| Active Conservation of Dry Grasslands in CE Poland | Rm, Rb | *Galium verum* | *Galium album* | 18 |
| DISEQALP |  | *Anthoxanthum alpinum* | *Anthoxanthum* aggr. | 387 |
|  |  | *Anthoxanthum odoratum* | *Anthoxanthum* aggr. | 351 |
|  |  | *Anthoxanthum odoratum* aggr. | *Anthoxanthum* aggr. | 20 |
|  |  | *Empetrum hermaphroditum* | *Empetrum* aggr. | 176 |
|  |  | *Empetrum nigrum* | *Empetrum* aggr. | 55 |
|  |  | *Empetrum nigrum* aggr. | *Empetrum* aggr. | 6 |
|  |  | *Sesleria varia* aggr. | *Sesleria* aggr. | 59 |
|  |  | Sesleria albicans | *Sesleria* aggr. | 1,022 |
| forestREplot_EU_023a |  | Tilia platyphyllos | *Tilia cordata* | 6 |
| GLORIA_NO-DOV |  | *Empetrum nigrum* subsp. hermaphroditum | *Empetrum nigrum* | 53 |
|  |  | *Juncus trifidus* subsp. trifidus | *Juncus trifidus* | 40 |
| jaidhaus_2020_hschwaiger |  | *Leucanthemum vulgare* | *Leucanthemum vulgare* aggr. | 19 |
|  |  | *Leucanthemum ircutianum* | *Leucanthemum vulgare* aggr. | 50 |
|  |  | *Leucanthemum vulgare* aggr. | *Leucanthemum vulgare* aggr. | 64 |
| Milovice_grazing |  | *Rubus caesius* | *Rubus* sp. | 6 |
| PonorMts | Ponor | *Agrostis stolonifera* | *Agrostis capillaris* | 8 |
|  |  | *Cirsium vulgare* | *Cirsium ligulare* | 13 |
|  |  | *Euphrasia species* | *Euphrasia pectinata* | 34 |
| Valdemaqueda_Madrid |  | *Vicia angustifolia* | *Vicia lathyroides* | 151 |
| WS11 NWR Rotenberghang | StrictNR | *Dryopteris dilatata* | *Dryopteris carthusiana* aggr. | 5 |
|  |  | *Dryopteris carthusiana* | *Dryopteris carthusiana* aggr. | 29 |
| WS26 Hunstollen-Brache |  | *Dactylis glomerata* | *Dactylis glomerata* aggr. | 509 |
|  |  | *Dactylis glomerata* subsp. aschersoniana | *Dactylis glomerata* aggr. | 16 |

**Supplementary Data Table 2. Traits from the gap-filled dataset from the TRY Plant Trait Database**. Those traits that are used for this study are marked in bold.

| **Abbreviation** | **Trait description** |
| --- | --- |
| Chromosome.cDNAcont | Species genotype: chromosome cDNA content_pg |
| Chromosome.n | Species genotype: chromosome number_dimensionless |
| Disp.unit.leng | Dispersal unit length_mm |
| **LDMC** | **Leaf dry mass per leaf fresh mass (leaf dry matter content, LDMC)_g g-1** |
| Leaf.delta.15N | Leaf nitrogen (N) isotope signature (delta 15N)_per mill |
| LeafArea.leaf.noPet | Leaf area (in case of compound leaves: leaf, petiole excluded)_mm2 |
| **LeafArea.leaf.undef** | **Leaf area (in case of compound leaves: leaf, undefined if petiole in- or excluded)_mm2** |
| LeafArea.leaf.wPet | Leaf area (in case of compound leaves: leaf, petiole included)_mm2 |
| LeafArea.leaflet.noPet | Leaf area (in case of compound leaves: leaflet, petiole excluded)_mm2 |
| LeafArea.leaflet.undef | Leaf area (in case of compound leaves: leaflet, undefined if petiole is in- or excluded)_mm2 |
| LeafArea.leaflet.wPet | Leaf area (in case of compound leaves: leaflet, petiole included)_mm2 |
| LeafArea.undef.undef | Leaf area (in case of compound leaves undefined if leaf or leaflet, undefined if petiole is in- or excluded)_mm2 |
| LeafC.perdrymass | Leaf carbon (C) content per leaf dry mass_mg/g |
| **LeafCN.ratio** | **Leaf carbon/nitrogen (C/N) ratio_g/cm3** |
| LeafDryMass.single | Leaf dry mass (single leaf)_mg |
| Leaffreshmass | Leaf fresh mass_g |
| LeafLength | Leaf length_mm |
| LeafN | Leaf nitrogen (N) content per leaf dry mass_mg/g |
| LeafNperArea | Leaf nitrogen (N) content per leaf area_g m-2 |
| **LeafP** | **Leaf phosphorus (P) content per leaf dry mass_mg/g** |
| **LeafThickness** | **Leaf thickness_mm** |
| LeafWaterCont | Leaf water content per leaf dry mass (not saturated)_g(W)/g(DM) |
| LeafWidth | Leaf width_cm |
| PlantHeight | Plant height (vegetative + generative) |
| PlantHeight.generative | Plant height generative_m |
| **PlantHeight.veg** | **Plant height vegetative_m** |
| **RootingDepth** | **Root rooting depth_m** |
| Seed.length | Seed length_mm |
| Seed.num.disp.unit | Seed number per dispersal unit_number |
| Seed.num.rep.unit | Seed number per reproducton unit_number |
| SeedGerminationRate | Seed germination rate (germination efficiency)_% |
| **SeedMass** | **Seed dry mass_mg** |
| **SLA** | **Leaf area per leaf dry mass (specific leaf area, SLA or 1/LMA)** |
| SLA.noPet | Leaf area per leaf dry mass (specific leaf area, SLA or 1/LMA): petiole excluded_mm2 mg-1 |
| SLA.photosinthetic.tissues | Leaf area per leaf dry mass (specific leaf area, SLA or 1/LMA) petiole, rhachis and midrib excluded |
| SLA.undef | Leaf area per leaf dry mass (specific leaf area, SLA or 1/LMA): undefined if petiole is in- or excluded_mm2 mg-1 |
| SLA.wPet | Leaf area per leaf dry mass (specific leaf area, SLA or 1/LMA): petiole included_mm2 mg-1 |
| **SpecificRootLength** | **Root length per root dry mass (specific root length, SRL)_cm/g** |
| **SpecificRootLength.fine** | **Fine root length per fine root dry mass (specific fine root length, SRL)_cm/g** |
| **Stem.cond.dens** | **Stem conduit density (vessels and tracheids)_mm-2** |
| **StemConduitDiameter** | **Stem conduit diameter (vessels, tracheids)_micro m** |
| StemDens | Stem specific density (SSD) or wood density (stem dry mass per stem fresh volume)_g/cm3 |
| **StemDiam** | **Stem diameter_m** |
| Wood.vessel.length | Wood vessel element length; stem conduit (vessel and tracheids) element length_micro m |
| WoodFiberLength | Wood fiber lengths_micro m |
| WoodRay.millimetre | Wood rays per millimetre_number |

**Supplementary Data Fig. 1. Bivariate correlations among the 46 traits of the gap-filled TRY plant trait database**, calculated for the subset of 3,834 taxa that occurred in our vegetation-plot time series data. Trait names and descriptions are noted in Supplementary Data Table 2. Correlations are quantified as Pearson’s *r*.


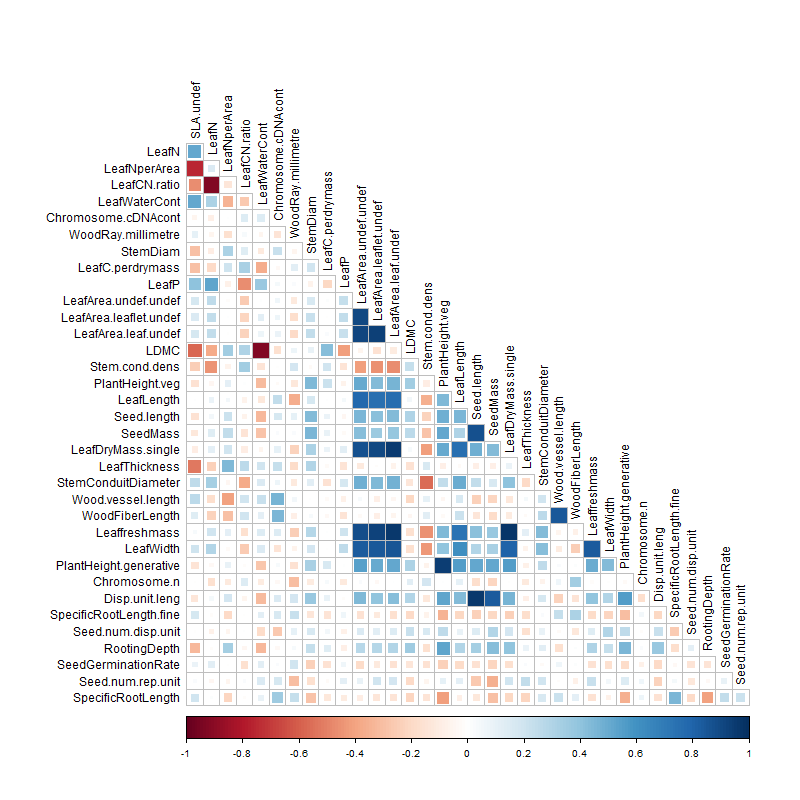


**Supplementary Data Fig. 2. The first eight principal components in the joint relationships among the 46 traits of the gap-filled TRY plant trait database**, calculated for the subset of 3,834 taxa that occurred in our vegetation-plot time series data. Trait names and descriptions are noted in Supplementary Data Table 2. For each pair of principal components, the 10 traits with the strongest relationships are shown in black; the less weakly related traits are only indicated with grey arrows.


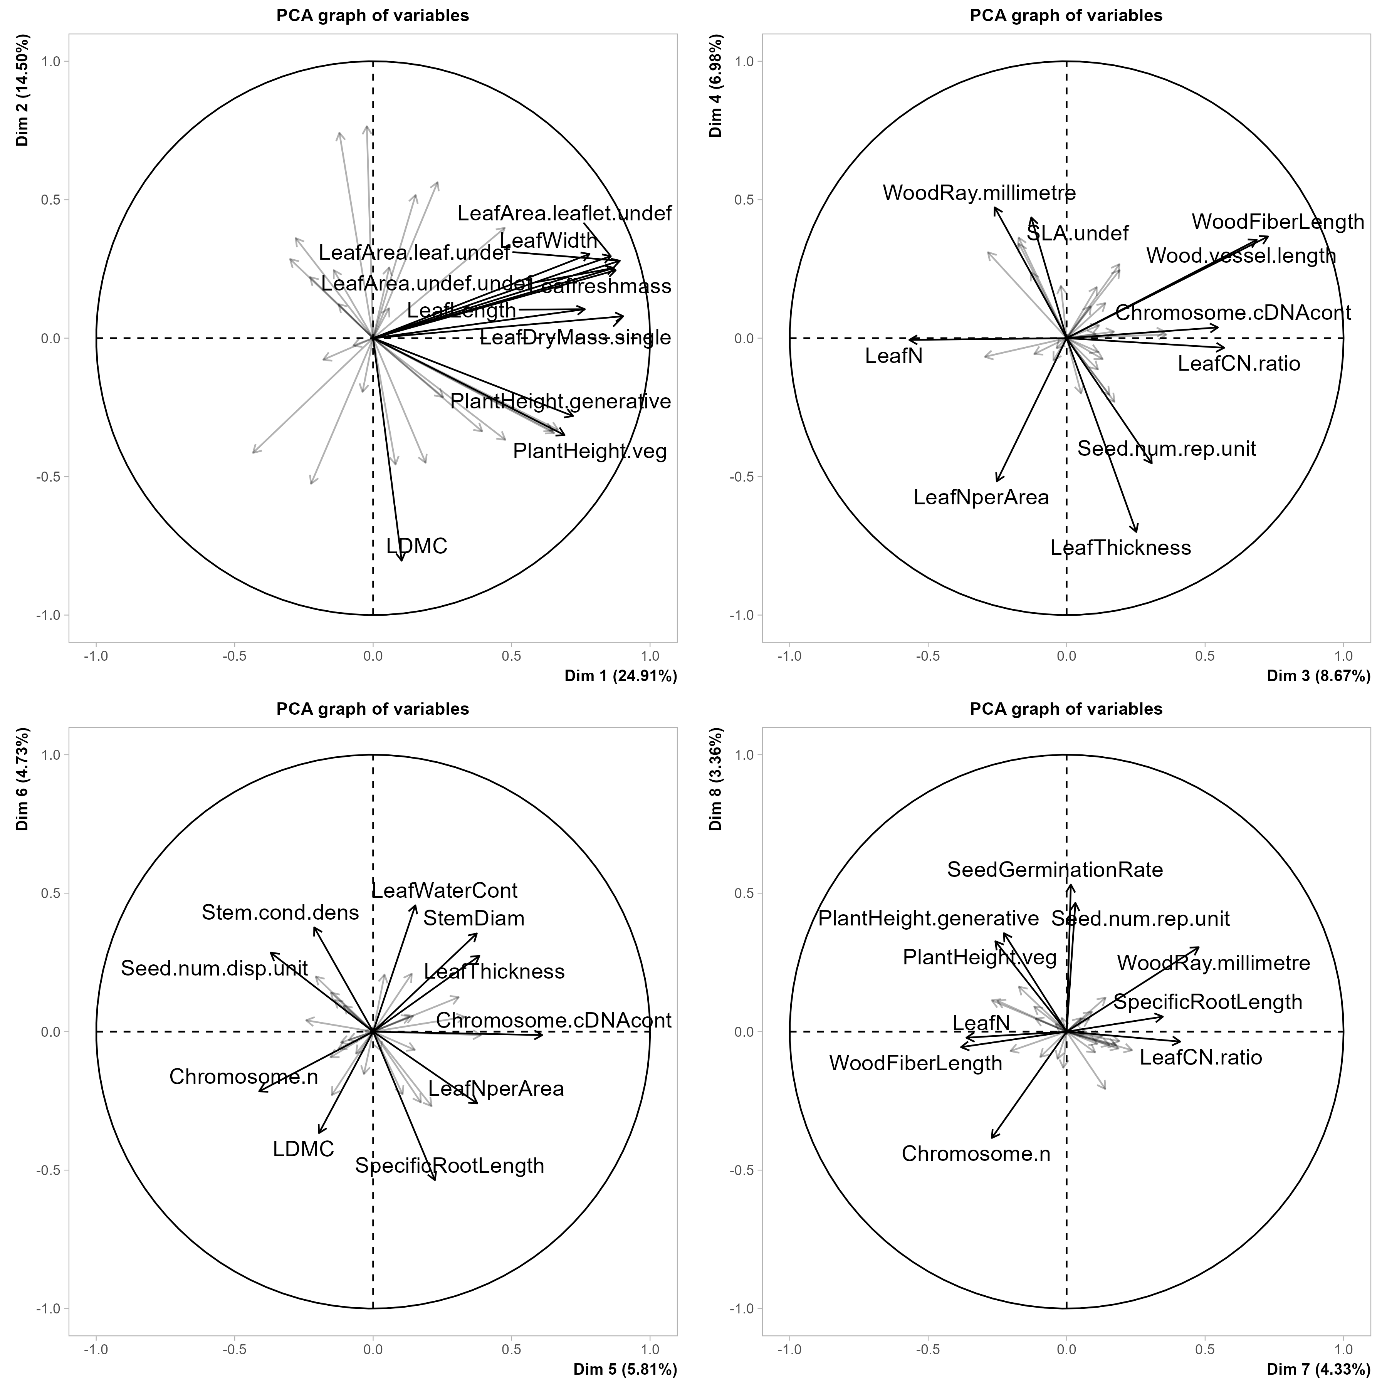


**Supplementary Data Fig. 3. Sample sizes of diversity and composition indices**, separately for the number of vegetation surveys and the number of time series data (consisting of multiple vegetation surveys) within each of the EUNIS level 1 habitat types.


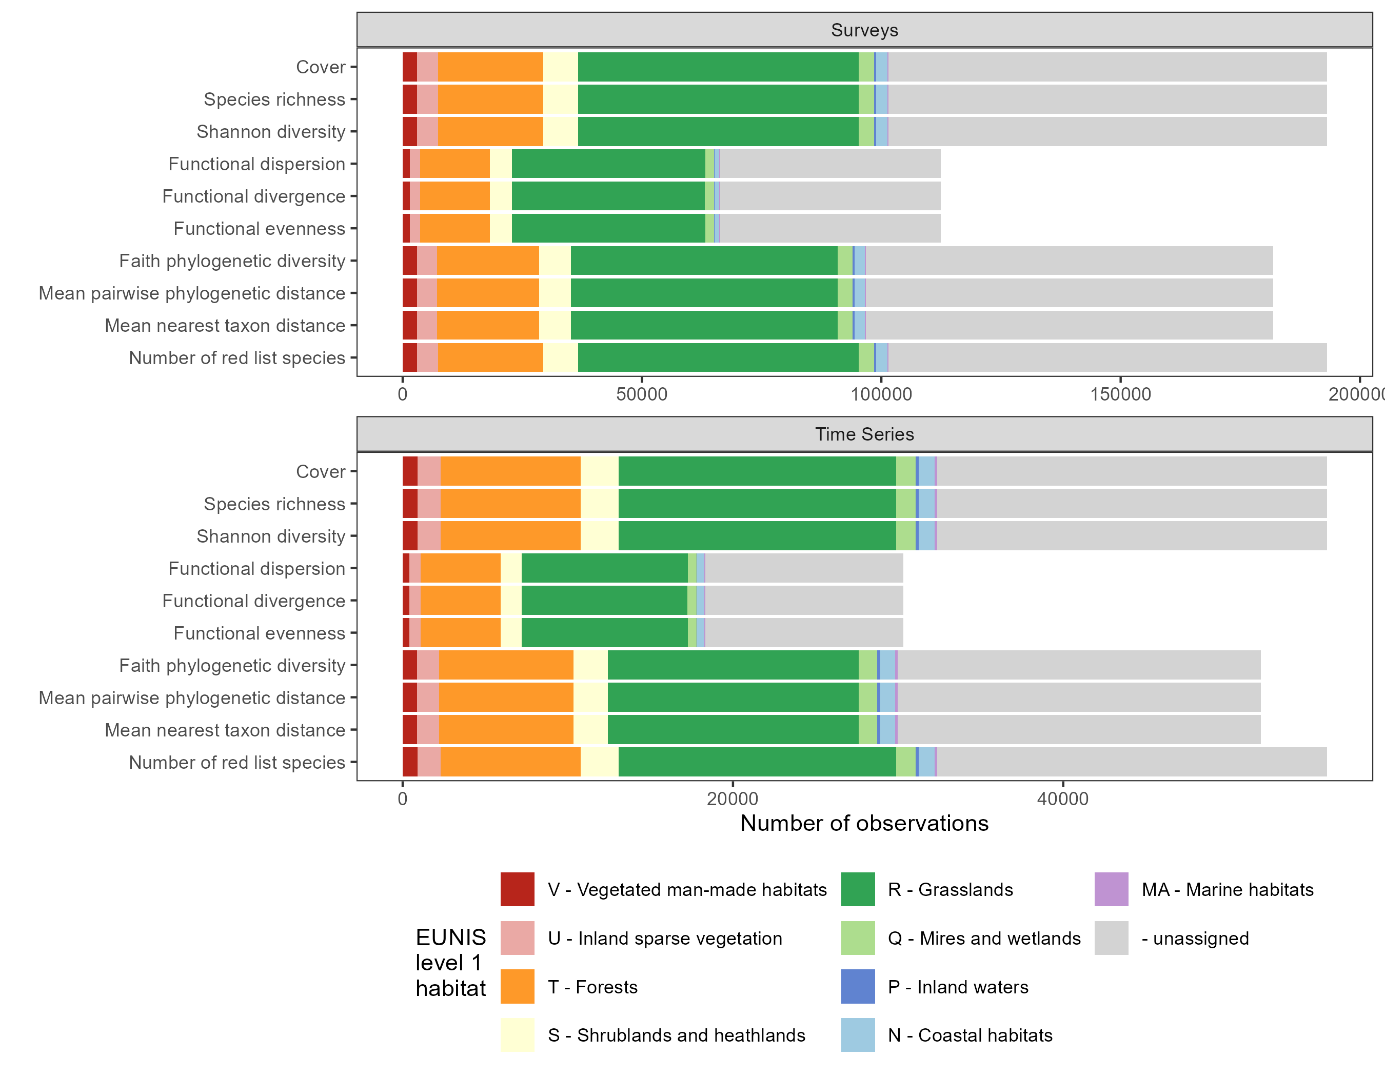


**Supplementary Data Fig. 4. Average annual percentage changes in different indices of plant diversity, separated by EUNIS level 1 habitat types** (estimated with weighted linear models in which each time series contributed according to the logarithm of the number of vegetation surveys).


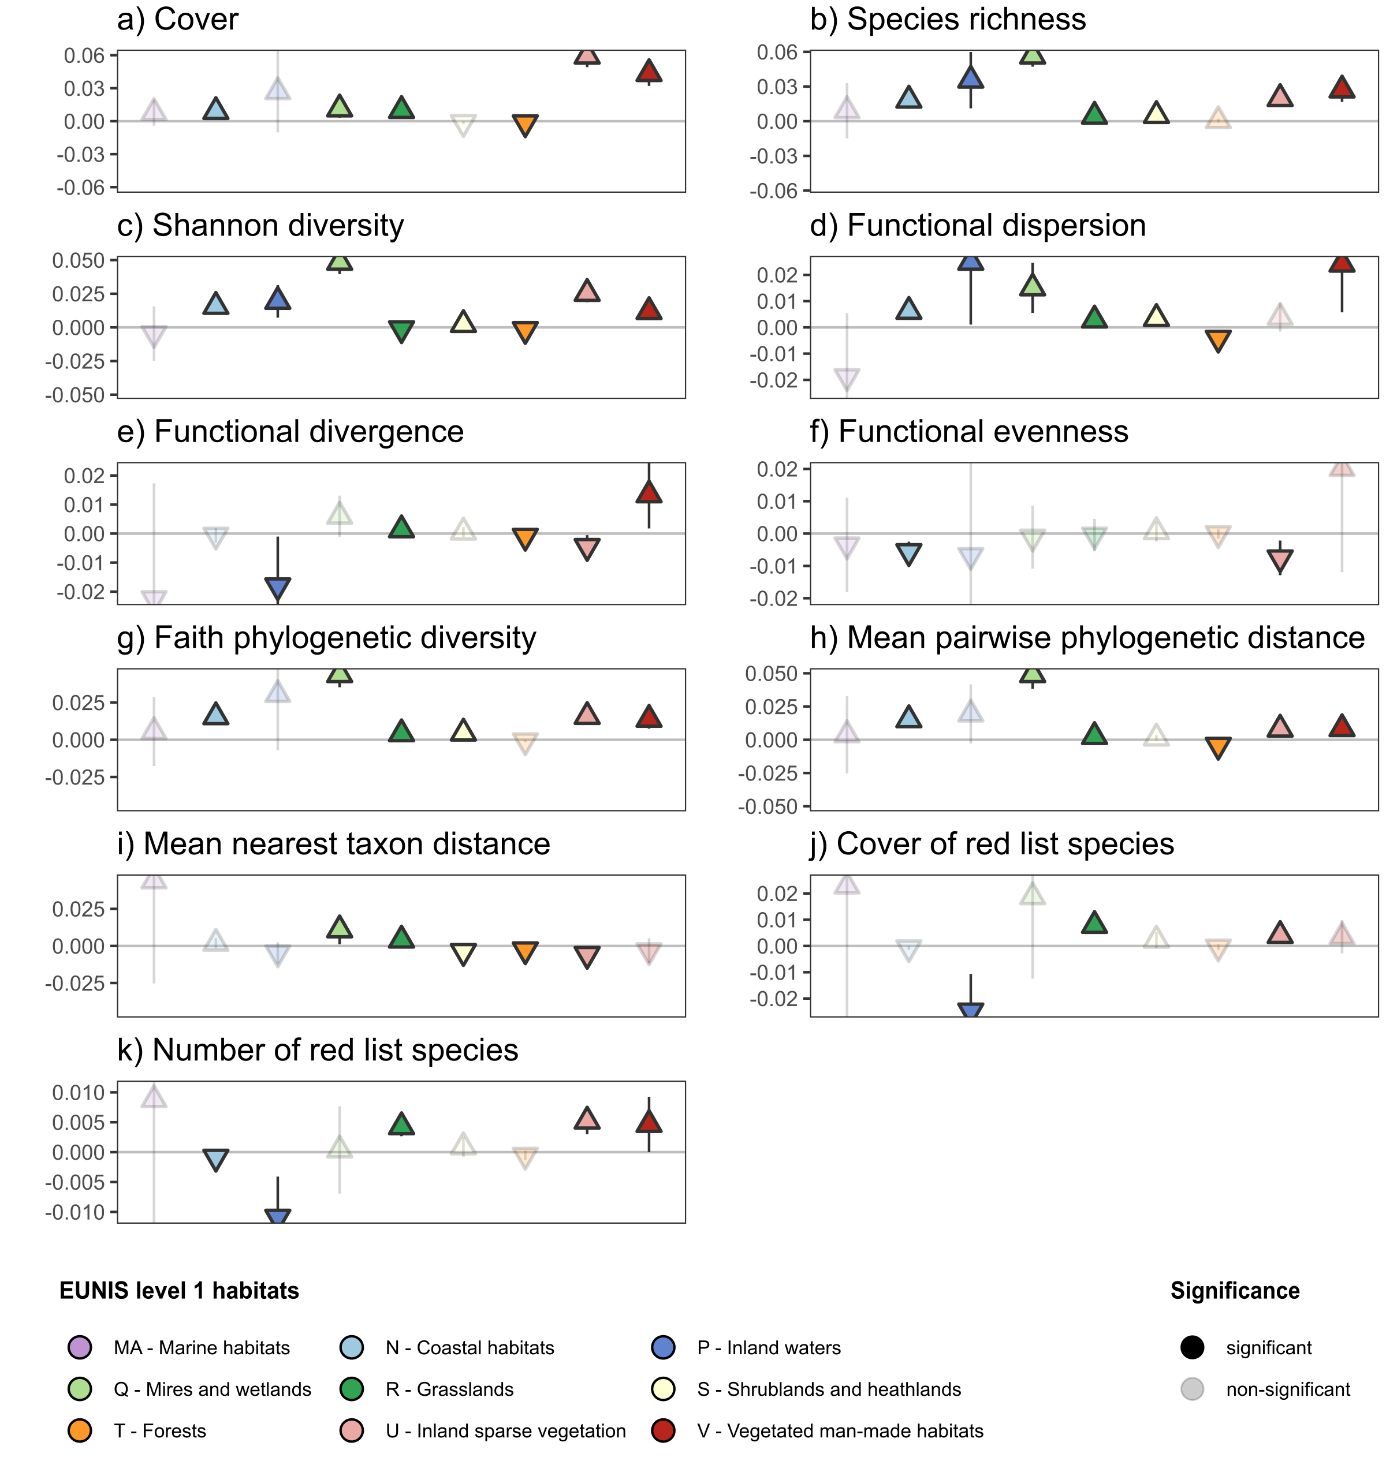


**Supplementary Data Fig. 5a**. **Average annual percentage changes in different indices of plant diversity, separated by the different combinations of EUNIS level 1 habitat type and habitat-change trajectories** (estimated with weighted linear models in which each time series contributed according to the logarithm of the number of vegetation surveys). Habitat-change trajectories were assigned based on shifts in EUNIS level 3 habitat types between the initial versus the last vegetation survey.


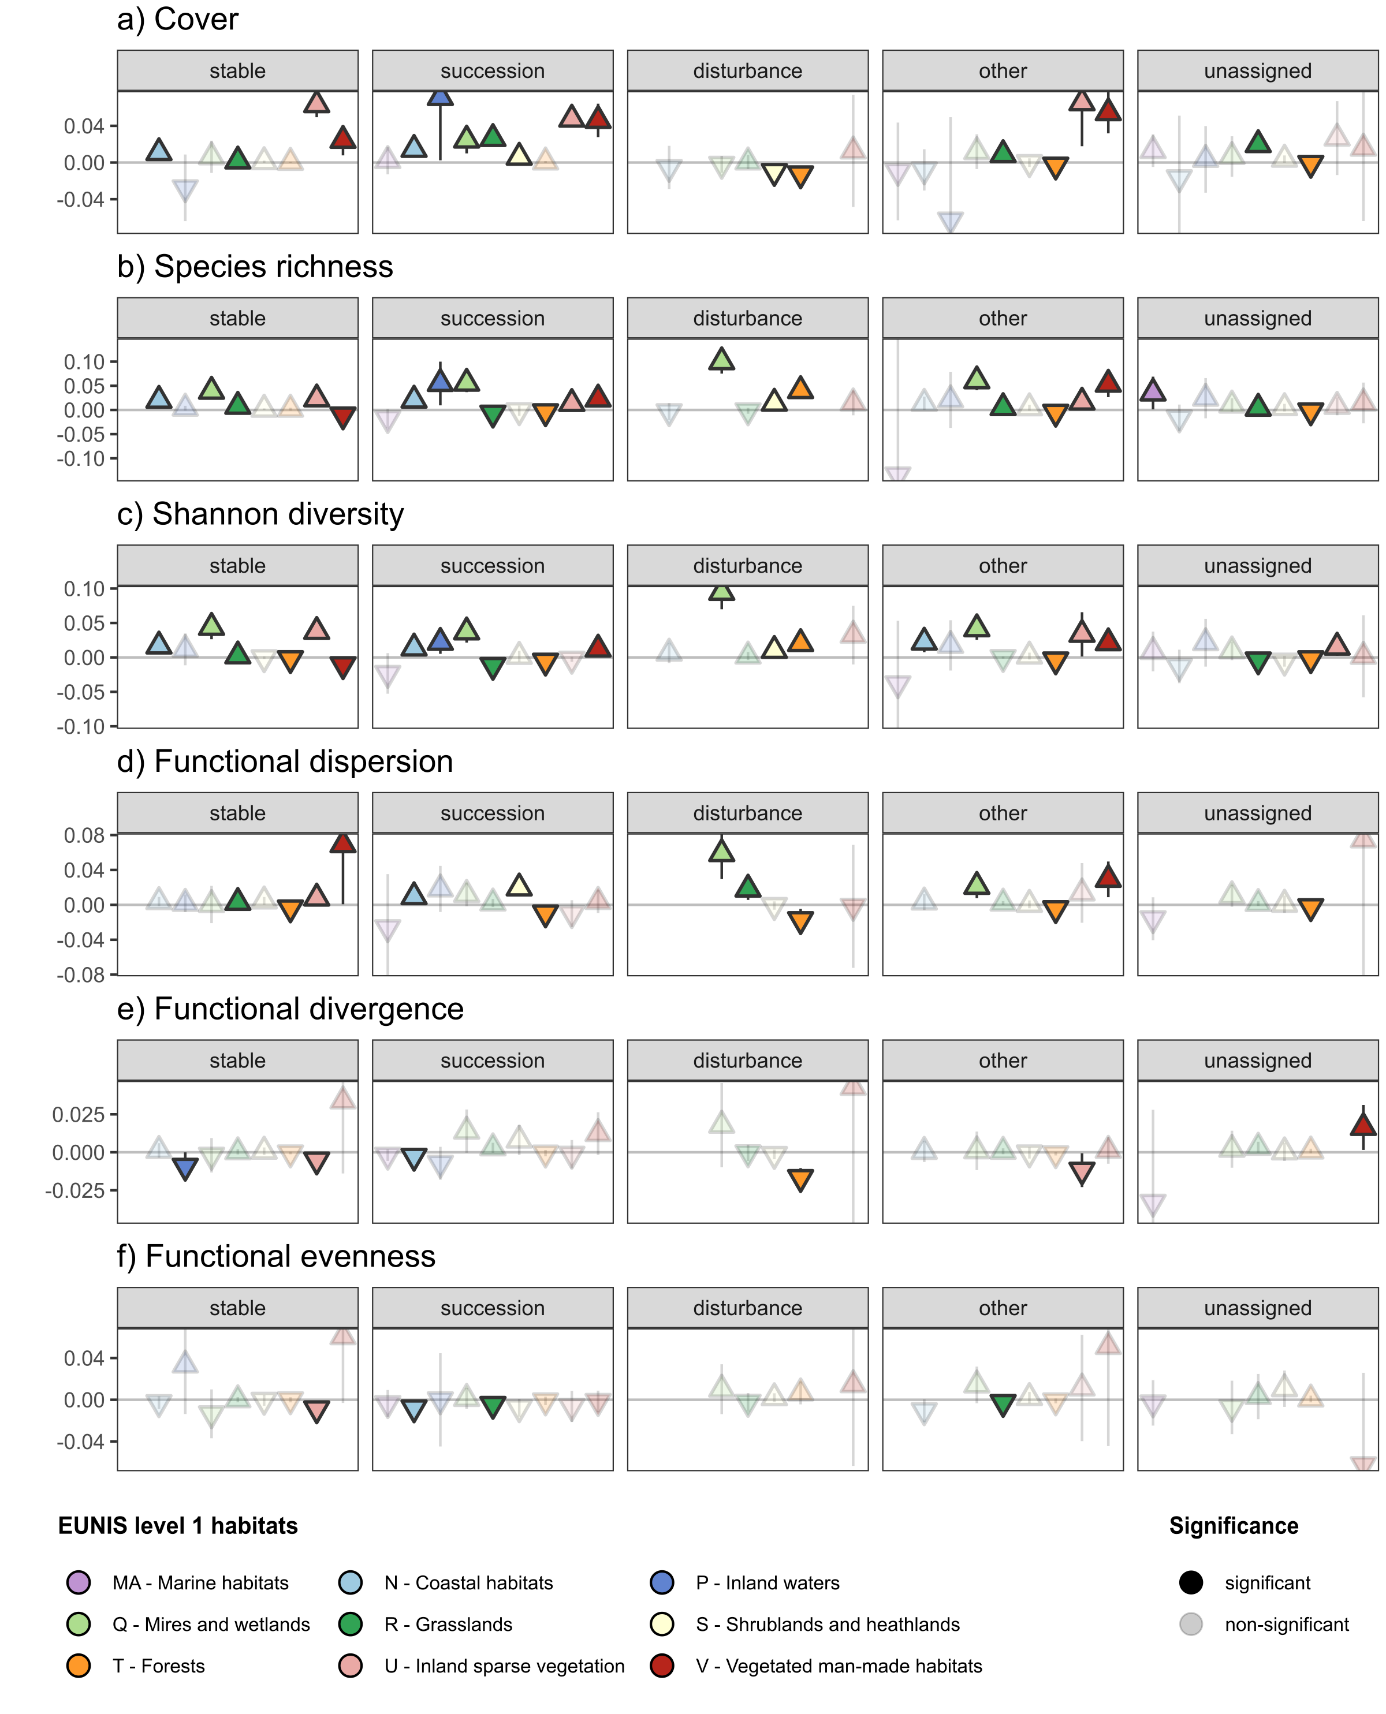


**Supplementary Data Fig. 5b**. **Average annual percentage changes in different indices of plant diversity, separated by the different combinations of EUNIS level 1 habitat type and habitat-change trajectories** (estimated with weighted linear models in which each time series contributed according to the logarithm of the number of vegetation surveys). Habitat-change trajectories were assigned based on shifts in EUNIS level 3 habitat types between the initial versus the last vegetation survey.


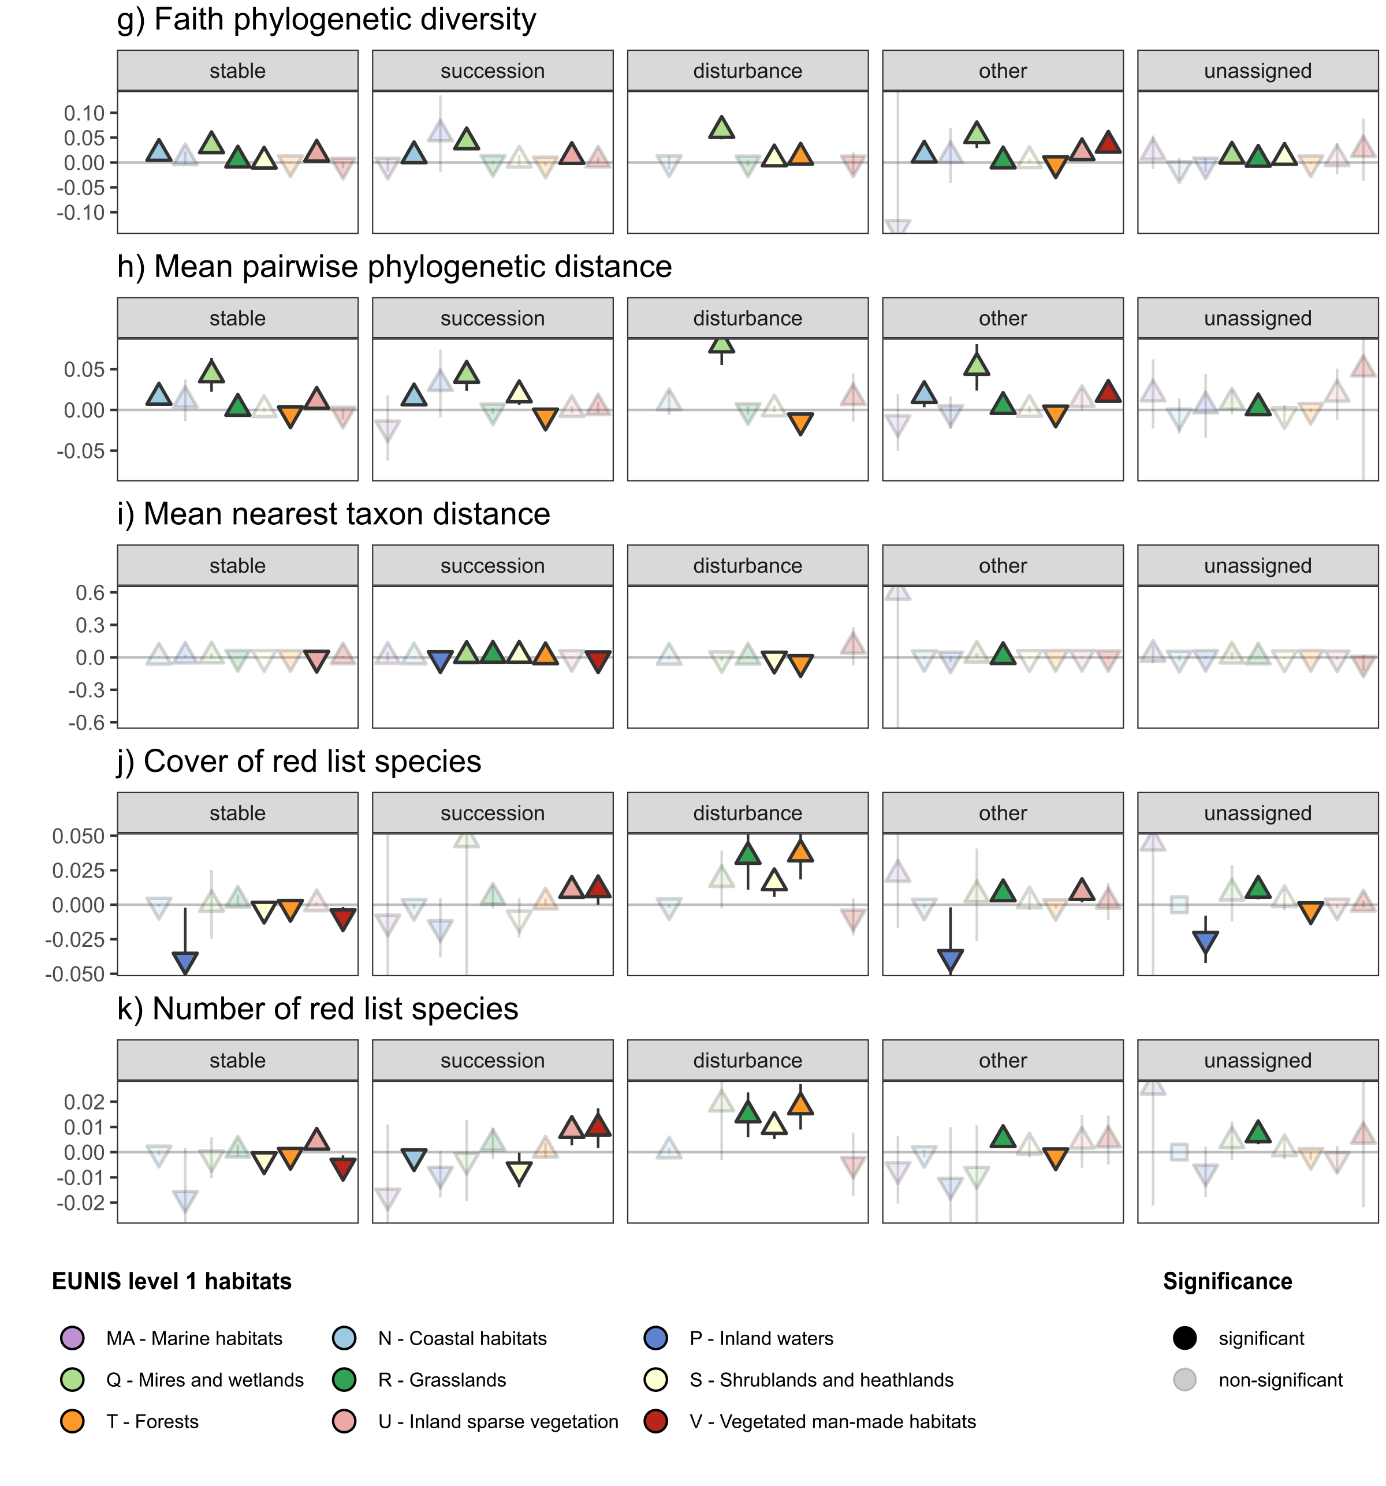

Supplement: Supplementary file 1 [file 60380aba5bdba8a9d3e022e6.docx]
